# Supplementary material for: Multi-parametric single cell evaluation defines distinct drug responses in healthy hematologic cells that are retained in corresponding malignant cell types
Source: PubMed Central journal article supplement — Haematologica. 2019 Aug 22;105(6):1527–38. doi: 10.3324/haematol.2019.217414 (PMC7271564; doi:10.3324/haematol.2019.217414), 2020-06
Supplement: 2019_217414-Disclosures_and_Contributions.pdf [file 2019_217414-Disclosures_and_Contributions.pdf]

Haematologica  
HAEMATOL/2019/217414  
Version 3

Multi-parametric single cell evaluation defines distinct drug responses  
in healthy hematological cells that are retained in corresponding  
malignant cell types

Muntasir M. Majumder, Aino-Maija Leppä, Monica Hellesøy, Paul  
Dowling, Alina Malyutina, Reidun Kopperud, Despina Bazou, Emma  
Andersson, Alun Parsons, Jing Tang, Olli Kallioniemi, Satu Mustjoki,  
Peter O'Gorman, Krister Wennerberg, Kimmo Porkka, Bjørn T.  
Gjertsen, and Caroline A. Heckman

Disclosures: CAH has research funding from Celgene, Novartis, Orion Pharma and  
Oncopeptides, as well as the Innovative Medicines Initiative project HARMONY.

Contributions: MMM designed the work and wrote the manuscript. MMM, AML, MH, PD,  
RK and AP performed experimental work. MMM, AML, MH, AM and PD analyzed the data.  
BTG, JT, OK, POG, KP, SM and KW advised on the study. CAH supervised the study. All  
authors contributed to the writing and reviewed the manuscript.
